# Supplementary material for: Inhibition of γ-glutamyl transferase suppresses airway hyperresponsiveness and airway inflammation in a mouse model of steroid resistant asthma exacerbation
Source: Front Immunol. 2023 Jun 12;14:1132939. doi: 10.3389/fimmu.2023.1132939 (PMC10292800; doi:10.3389/fimmu.2023.1132939)
Supplement: Supplementary file 5 [file Table_2.xlsx]

## Sheet: supplementary table2
Supplementary Table 2: Heat Map table of top 50 significant DEGs in PBS group, OVA/LPS/vehicle group and OVA/LPS/GGsTop group.
	Dcpp2	Pth	Lipf	Myh4	Tg	Myh1	Mybpc1	Tpo	Slc26a7	Cxcl5	Dmbt1	Chga	Scg2	Wfdc18	Calca	Ccl20	Slc5a5	mt-Nd3	Actn3	Prlr	Gjc3	Ncam2	Adtrp	Rgs13	Mylpf	Cxcl2	mt-Atp6	Cd8b1	Dbp	Themis	Depdc1a	Cr2	mt-Co3	Ccl28	Klhl14	Nr1d1	Gbp6	Mybl1	Aicda	Scg5	Gbp10	Cxcl1	Mpp3	Rbp7	Gm4951	Ifitm5	Per2	Hif3a	Pla2g4b
PBS1.read.count	-0.518358	-0.544058	-0.354716	-0.62162	-0.533091	-0.277682	-0.61742	-0.176979	-0.416487	-0.398694	-0.434028	-0.812127	-0.663471	-0.864277	-0.524968	-0.994148	-0.753766	-0.819546	-0.418102	-0.676964	-1.3612	-0.534059	-0.149164	-0.84779	-0.482242	-0.220085	-0.824604	-0.354026	-1.24456	-0.361302	0.220838	-0.261709	-0.865723	-0.830573	1.1235	-1.25819	0.722664	-0.737901	-0.785215	-0.930849	-0.289031	-0.840321	-0.675365	-0.794988	1.12134	1.09898	-1.087	-0.842014	0.792281
PBS2.read.count	-0.518358	-0.544058	-0.540388	-0.378907	-0.627242	-0.394375	-0.336214	-0.402636	-0.125038	-0.459812	-0.0982579	-0.513697	-0.634394	-0.864277	-0.642146	-0.425281	-0.221064	-0.954969	-0.487156	-0.260359	0.448159	-0.137865	0.0216127	-0.509638	-0.0607825	-0.988147	-0.587115	0.663284	-0.691794	0.270717	0.00751916	1.20884	-0.177308	0.213251	0.766199	0.279215	0.0964043	-0.802638	-0.474647	0.401558	0.282732	-0.548263	-0.876968	-0.340916	0.147005	-0.208897	-1.11556	-0.969835	-0.589778
PBS3.read.count	-0.43574	-0.430441	-0.565618	-0.295644	-0.440053	-0.402013	-0.350268	-0.460903	-0.836967	-0.852491	-0.980965	-0.617602	-0.703679	-0.864277	-0.177789	-0.975304	-0.849755	-1.1344	-0.178704	-1.32417	-1.09173	-0.84847	-1.26324	-0.735824	0.102321	-0.823103	-1.3653	-0.577148	-1.369	-1.04453	-0.86413	-0.887531	-1.37439	-1.24356	-0.174797	-0.993861	-0.94239	-1.0946	-0.712836	-0.644674	-0.696446	-0.695059	-0.126683	-1.24104	-0.59132	0.0513974	-0.697078	-0.432049	0.953702
OL12.read.count	0.403193	0.130839	0.811113	0.349965	1.25425	-0.547203	0.229182	0.137169	0.54943	0.901163	0.843922	0.304374	1.45251	0.775776	-0.250992	0.858172	-0.136313	1.40083	-0.0133141	0.68524	1.16096	2.71209	1.92215	1.39196	0.179833	1.38129	0.986474	2.63968	-0.539287	2.57067	2.44838	1.57496	1.09763	0.984488	0.649437	-0.873622	2.42915	1.78262	1.33385	2.31699	2.70868	1.34838	-1.08409	1.26916	2.35473	-1.1879	-0.621275	-0.481283	-1.17048
OL34.read.count	0.825968	1.61652	1.53887	2.29038	1.54335	2.6684	2.66669	1.80952	1.61345	1.40914	1.44308	1.57376	0.735696	0.940017	1.04635	1.63592	1.84224	0.768581	2.88809	1.29422	-0.142658	-0.115187	0.472993	-0.701833	2.68016	1.89959	0.453887	-0.442756	-0.153717	-0.31204	-0.139521	-0.48396	0.543271	0.968827	-0.0831832	-0.290032	0.373211	0.363837	-0.236525	-0.0722247	-0.141932	2.01183	-0.507041	0.191415	-0.14036	-1.16886	-0.679541	-0.597257	-0.649266
OL56.read.count	2.68636	2.2989	2.10446	1.52409	1.80825	1.08128	0.924623	2.1043	2.07219	1.1796	1.89471	2.25059	2.17441	2.31099	2.65951	1.52562	2.09624	1.41759	0.181322	2.13027	1.54345	0.636699	0.849087	2.35348	0.678102	0.970365	1.93699	0.541364	-0.118261	0.723384	0.997696	1.62962	1.55027	1.30531	1.95364	-0.715053	-0.173302	1.88326	2.44173	0.95626	-0.458695	0.485124	-0.459798	1.78946	0.143259	0.153007	-0.369117	-0.731321	-1.461
OL78.read.count	-0.369638	-0.544058	-0.630249	-0.381793	-0.643623	-0.245533	-0.339557	-0.73208	-0.321784	1.41472	-0.0847608	-0.629679	-0.3363	-0.0991178	-0.382134	0.709703	-0.481759	1.22842	-0.897971	-0.052559	1.29214	-0.304516	0.930913	-0.0221309	-0.836767	0.219939	1.14562	-0.256346	-0.506543	0.308281	0.0397295	-0.0675699	1.42139	1.03734	-0.739879	-0.733046	0.232889	0.223304	-0.282459	0.0015294	0.720406	0.766316	-0.594256	0.77714	0.190109	-1.36954	-0.198998	-0.828113	-0.619597
OLG1.read.count	-0.518358	-0.351467	-0.584343	-0.62162	-0.326064	-0.547203	-0.61742	-0.73208	-0.836967	-0.996795	-0.992634	-0.383952	-0.418216	-0.864277	-0.276208	-0.72394	-0.541948	-0.713684	-0.184748	-0.498862	-0.449866	-0.815207	-1.05807	-0.338502	-0.599841	-0.885594	-0.452781	-0.442542	1.46856	-0.600569	-0.982408	-0.721106	-0.508939	-0.462895	-0.517708	1.33196	-0.673523	-0.475857	-0.509248	-1.01417	-0.446807	-0.860516	2.08432	-0.849771	-1.11168	1.27042	1.47536	1.66483	1.81039
OLG2.read.count	-0.518358	-0.544058	-0.523962	-0.62162	-0.709791	-0.547203	-0.324773	-0.489465	-0.56505	-0.674817	-0.46797	-0.439392	-0.236121	-0.058575	-0.214739	-0.564639	-0.212162	-0.603016	-0.164631	-0.410008	-0.702292	0.177406	-0.253416	0.13818	-0.34273	-0.862824	-0.368281	-0.123548	0.973746	-0.139838	-0.312406	-0.106765	-0.338587	-0.997872	-1.21106	0.865623	-1.1867	-0.216476	0.192465	-0.215503	-0.280257	-0.438902	0.673946	0.205031	-0.732819	-0.503766	0.715952	0.777957	-0.0858546
OLG3.read.count	-0.518358	-0.544058	-0.570331	-0.62162	-0.67702	-0.241264	-0.61742	-0.56681	-0.836967	-0.990133	-1.11512	-0.532748	-0.673317	-0.415554	-0.528376	-0.873491	-0.43553	-0.220846	-0.201797	-0.778765	-0.793392	-0.626179	-1.28743	-0.60061	-0.532936	-0.454029	-0.685396	-0.753778	1.21363	-0.713468	-0.454226	-0.943059	-0.923613	-1.30747	-1.01155	1.39713	-0.116435	-0.413507	-0.416236	-1.0607	-0.765265	-0.873284	1.39008	-1.20574	-0.578863	1.41344	1.45302	1.17849	0.52095
OLG4.read.count	-0.518358	-0.544058	-0.684832	-0.62162	-0.648967	-0.547203	-0.61742	-0.490036	-0.295802	-0.531875	-0.00798361	-0.199526	-0.69712	0.00356936	-0.708509	-0.172617	-0.306179	-0.368962	-0.522988	-0.108042	0.0964227	-0.144708	-0.185442	-0.127293	-0.785113	-0.237402	-0.239488	-0.89419	0.967227	-0.701298	-0.961469	-0.941714	-0.424004	0.333148	-0.754592	0.989885	-0.761967	-0.512046	-0.550877	0.261776	-0.633389	-0.355306	0.175856	0.200244	-0.801402	0.451715	1.12423	1.26059	0.498643
[truncated: 1 more columns]
