# Supplementary material for: Inhibition of γ-glutamyl transferase suppresses airway hyperresponsiveness and airway inflammation in a mouse model of steroid resistant asthma exacerbation
Source: Front Immunol. 2023 Jun 12;14:1132939. doi: 10.3389/fimmu.2023.1132939 (PMC10292800; doi:10.3389/fimmu.2023.1132939)
Supplement: Supplementary file 6 [file Table_3.xlsx]

## Sheet: supplementary table3
Supplementary Table 3: Heat Map table of the core genes in the enriched cellular response to LPS.
	Gfi1	Pdcd4	Cd84	Tnf	Nr1h5	Stat1	Plaa	Il12a	Tut4	Pdcd1lg2	Tlr4	Mef2c	Ccl12	Plscr1	Il1b	Casp1	Cmpk2	Il12b	Cd274	Ncl	Mtdh	Ly96	Cxcl15	Ppbp	Ly86	Ccl5	Cd14	Cd6	Cebpb	Spon2	Cdc73	Ticam2	Acod1	Irgm2	Klrk1	Ccl2	Hmgb1	Cd36	Gbp2	Cd180	Cxcl13	Il10	Tnfsf4	Il6	Ltf	Nuggc	Cxcl10	Tnip3	Stap1
PBS1.read.count	-0.49873	-0.906403	-0.851219	-0.913668	-1.73995	0.53426	-0.420533	1.27697	0.531368	-0.479237	-0.955398	-0.189659	-0.0258743	-0.530916	0.260975	-0.650467	1.59256	0.172919	-0.247187	-0.646514	0.142478	-0.224734	1.00828	0.556702	-0.66404	0.07201	-1.20976	-0.131419	0.255418	1.47286	-0.23073	-1.42587	-1.59666	0.379714	1.7339	-1.12231	0.0225779	0.45461	0.414224	0.865684	-0.69849	-1.06383	0.643166	-0.627934	-1.04506	-1.04128	-0.875614	-0.758434	-0.225944
PBS2.read.count	-0.630992	0.299527	-0.721827	-0.378524	-1.73995	0.894276	-0.237347	1.50019	0.957462	-0.768388	-0.0640401	0.69021	-1.22432	-0.308583	-0.390118	-0.540849	-0.847896	0.734823	-0.431972	-0.119937	-0.164203	-0.474136	0.168016	-0.940492	-0.362302	1.07839	-0.35286	1.36844	-0.642589	0.58633	-0.345789	-1.23842	0.172952	0.251213	0.209046	-0.840181	-0.256486	0.0312409	0.176774	0.987734	1.21494	-1.06383	-1.43894	0.128181	0.308427	-1.04778	1.05196	-0.352401	0.573408
PBS3.read.count	-0.841848	-2.20566	-1.46748	-0.337637	0.0374347	-0.495989	-2.18685	0.919302	-0.92292	-1.28617	-1.78116	-2.25235	1.0184	-0.986666	1.81311	-1.87569	0.276485	-1.27044	-0.397044	-2.03698	-1.91087	-2.25331	-0.161394	0.306984	-1.43367	1.40827	-0.56567	0.36416	0.736578	2.13147	-2.16089	-1.02899	0.186181	0.0620714	-0.906648	-0.918876	-2.53178	-1.15677	-0.616653	-0.455629	-0.831072	-1.06383	-1.43894	-1.18754	-1.97241	-1.38919	-0.0424646	-1.22215	-1.26971
OL12.read.count	2.72322	0.884988	1.43501	1.38125	0.143349	2.37468	0.75064	-0.491361	1.28607	1.38402	0.704175	0.868619	0.569986	0.220217	0.743614	1.62379	1.19326	1.84569	2.83049	0.857942	0.92866	0.203566	-0.270662	-0.386969	0.505721	0.517289	0.0409056	1.94378	-1.10184	-0.408499	0.709276	1.15543	-0.41208	2.69898	1.61946	0.54477	0.58683	1.07407	2.42677	1.93928	1.0738	2.00959	0.439721	-0.100279	0.551446	1.69778	2.15251	0.30327	1.97633
OL34.read.count	-0.339686	0.792653	0.499805	-0.359092	0.953024	-0.198602	1.2784	-0.130157	0.657388	-0.584168	1.16898	0.538051	-1.34392	1.92476	1.16713	0.657673	0.926126	-0.193109	-0.356135	1.15374	1.35553	1.41203	1.2283	1.7192	0.804536	-0.34454	1.58246	-1.21311	-0.104735	-0.0846738	1.03333	1.20121	2.37608	-0.440766	0.310506	1.04081	0.987809	1.27364	0.0699267	-0.770371	-0.908909	-0.0228996	0.0360534	1.73745	0.832499	-0.693807	-0.569175	1.53137	0.198375
OL56.read.count	-0.284195	1.31981	-0.62811	0.550637	0.578596	0.158388	1.36047	0.834168	0.813961	-0.0097017	0.181218	1.43586	0.477777	0.914176	-0.906859	0.0237242	0.177195	0.796207	-0.778912	1.35359	1.01931	0.925659	0.134938	0.935249	1.5029	1.0809	0.823344	0.41047	1.2502	-0.540522	1.35685	0.628206	-0.285256	-0.565975	-0.128684	0.338146	1.06165	1.23799	0.674735	0.970151	1.60119	0.39782	0.795464	1.50569	1.07288	1.22848	0.0700281	0.0854708	1.43324
OL78.read.count	-0.662245	0.594856	1.65141	1.12835	0.870155	-0.568285	0.683301	-0.696387	0.747287	1.91188	1.61997	0.613029	1.93768	1.21557	0.25823	1.5866	0.474798	-0.708532	0.199779	0.929255	1.0218	0.841534	1.41792	0.671455	1.57834	-0.611191	1.24706	-0.328825	1.74601	-0.160032	1.02295	1.36557	0.224283	-0.176509	0.100041	1.58216	0.782645	0.656053	0.00682799	-0.777696	0.0232096	0.362164	1.41002	0.760747	0.491562	0.581056	0.331547	2.01943	-0.216514
OLG1.read.count	0.152142	-0.1874	0.211001	-1.42617	0.391973	-0.211986	-0.347476	-0.129476	-0.670453	0.713583	-0.553829	-0.104448	-1.15173	-0.626295	-0.707461	-0.266269	-1.0048	-1.06485	-0.155517	-0.271637	-0.712623	-0.33773	-1.164	-0.276026	-0.633509	-0.230303	-0.684405	-0.723244	-1.59066	-1.13437	-0.331057	-0.0170488	-0.752987	-0.489953	-0.202831	-0.739432	0.165057	-0.522563	-0.495622	-0.938029	-1.0658	0.737888	-1.43894	-0.625075	-0.206713	0.642609	0.620299	-0.437771	-0.319935
OLG2.read.count	0.65435	0.134285	0.68546	-1.33635	0.206635	-0.765064	-0.0531546	-1.21636	-0.687916	0.300091	0.323195	-0.386851	-0.070382	-0.964464	-0.38526	-0.198741	-0.820793	-0.113365	0.274866	-0.220901	-0.543891	0.701627	-0.0740371	-0.826696	0.272992	-0.155843	-0.0807157	0.236132	-0.739228	-0.594843	-0.349237	-0.0330924	0.651825	-0.498428	-0.160545	0.83039	-0.373446	-0.949848	-0.701821	-0.724035	0.0545864	0.774705	0.687216	0.31112	0.238616	0.403463	-1.20437	0.00644351	-0.290508
OLG3.read.count	0.0936124	-0.810181	-0.00424428	0.695802	1.06643	-0.346098	-0.452751	-0.387761	-1.21272	-0.988327	-0.943283	-0.743073	-0.105969	-1.09693	-0.113757	-0.224466	-0.477409	-1.11694	-0.102058	-0.630235	-0.381979	-0.647283	-0.324521	0.113533	-0.854813	-0.743767	-1.53108	-0.872006	-0.059286	-0.571829	-0.683694	-0.0283305	-0.661472	-0.00788811	-1.31855	-1.27977	0.0925083	-0.63783	-0.52042	-0.832425	-1.11364	-1.06383	0.010734	-1.01198	-1.23017	-0.311123	-0.908419	-1.03606	-0.775231
OLG4.read.count	-0.365626	0.0835211	-0.809799	0.995405	-0.767695	-1.37558	-0.3747	-1.47913	-1.49953	-0.193587	0.300166	-0.469384	-0.0816525	0.239135	-1.73961	-0.135308	-1.48953	0.917597	-0.836306	-0.368322	-0.754214	-0.147216	-1.96283	-1.87294	-0.716167	-2.07122	0.730724	-1.05438	0.25012	-0.695894	-0.0210025	-0.57865	0.0971321	-1.21246	-1.2557	0.564299	-0.537364	-1.46059	-1.43474	-0.26466	0.650183	-0.00393836	0.294466	-0.890382	0.958914	-0.0702171	-0.626314	-0.139173	-1.08351
[truncated: 8 more columns]
