# Supplementary material for: Inhibition of γ-glutamyl transferase suppresses airway hyperresponsiveness and airway inflammation in a mouse model of steroid resistant asthma exacerbation
Source: Front Immunol. 2023 Jun 12;14:1132939. doi: 10.3389/fimmu.2023.1132939 (PMC10292800; doi:10.3389/fimmu.2023.1132939)
Supplement: Supplementary file 7 [file Table_4.xlsx]

## Sheet: supplementary table4
Supplementary Table 4: Heat Map table of the core genes in the enriched NFκB signaling pathway.
	Tnf	Tab3	Cyld	Tlr4	Bcl2	Il1b	Tnfsf11	Prkcb	Vcam1	Ltb	Ly96	Cd40lg	Prkcq	Gadd45a	Cd14	Ptgs2	Ticam2	Ccl4	Ccl21a	Lat	Lck	Tnfrsf13c	Cxcl1	Cxcl3	Cxcl2	Ccl19
PBS1.read.count	-0.913668	0.0162098	-0.25058	-0.955398	0.747725	0.260975	-1.32471	-0.222925	1.27896	0.185695	-0.224734	-0.347548	-0.392382	-0.382297	-1.20976	-1.02486	-1.42587	-1.43104	-0.228836	-0.608401	-0.392297	-0.0838631	-0.840321	-0.866533	-0.220085	-0.979352
PBS2.read.count	-0.378524	0.257467	0.162218	-0.0640401	0.630565	-0.390118	0.140628	0.983096	0.17635	1.22514	-0.474136	0.654037	0.838441	-0.428623	-0.35286	-0.422782	-1.23842	-0.65525	2.04895	0.497346	0.770337	0.652915	-0.548263	-1.04219	-0.988147	1.50717
PBS3.read.count	-0.337637	-2.48808	-1.97223	-1.78116	-1.81805	1.81311	-1.10719	-0.54725	0.249339	1.23434	-2.25331	-1.38942	0.405119	-0.791461	-0.56567	-1.33647	-1.02899	-0.0582947	-0.518613	0.38098	0.439114	0.502437	-0.695059	-0.313959	-0.823103	-0.745665
OL12.read.count	1.38125	0.843962	1.16586	0.704175	1.0993	0.743614	1.33353	2.01089	-0.0614048	1.11267	0.203566	2.06242	1.46043	-0.110942	0.0409056	0.368119	1.15543	0.415611	1.22602	2.55283	2.32919	1.39778	1.34838	1.43962	1.38129	1.10102
OL34.read.count	-0.359092	1.16795	1.20878	1.16898	0.522829	1.16713	-0.279826	-0.925806	0.970315	-1.00491	1.41203	-0.00156693	-0.325947	1.71781	1.58246	1.84011	1.20121	1.24925	-0.464108	-0.60633	-0.932839	-0.645177	2.01183	1.48293	1.89959	-0.692457
OL56.read.count	0.550637	0.657597	1.01225	0.181218	1.33124	-0.906859	1.04095	0.526055	0.565897	0.926115	0.925659	-0.034808	1.16319	1.07342	0.823344	0.276274	0.628206	-0.627265	1.15139	0.520781	0.797322	1.78999	0.485124	0.0545325	0.970365	1.84427
OL78.read.count	1.12835	0.789234	0.857732	1.61997	0.369419	0.25823	0.502674	0.21637	1.24543	-0.267137	0.841534	0.58748	0.325515	1.54801	1.24706	1.66115	1.36557	1.66144	-0.491862	-0.696658	-0.379244	0.01247	0.766316	1.37686	0.219939	0.0320932
OLG1.read.count	-1.42617	-0.033176	-0.544127	-0.553829	-0.9852	-0.707461	-0.279449	-0.421466	-1.36157	-0.746096	-0.33773	-1.12398	-0.355821	-0.411009	-0.684405	-0.466423	-0.0170488	1.12927	-1.16826	-0.268485	-0.52779	-1.18547	-0.860516	-1.02247	-0.885594	-0.486524
OLG2.read.count	-1.33635	-0.686309	-0.166768	0.323195	-0.936841	-0.38526	1.55783	0.590543	-0.6507	-0.196866	0.701627	0.734364	-0.500257	-1.41118	-0.0807157	-0.0687987	-0.0330924	-0.350449	-0.466595	-0.10154	-0.323925	-0.458277	-0.438902	0.0280212	-0.862824	-0.466433
OLG3.read.count	0.695802	-0.236318	-0.611042	-0.943283	-0.343588	-0.113757	-0.639743	-1.60106	-0.841105	-0.988748	-0.647283	-0.0869991	-0.449994	-0.245915	-1.53108	-0.234517	-0.0283305	-0.251144	-0.643572	-0.591824	-0.796354	-1.27322	-0.873284	-0.885944	-0.454029	-0.705849
OLG4.read.count	0.995405	-0.288537	-0.86209	0.300166	-0.617397	-1.73961	-0.944691	-0.608446	-1.57151	-1.4802	-0.147216	-1.05397	-2.16829	-0.557817	0.730724	-0.591794	-0.57865	-1.08213	-0.444516	-1.0787	-0.983518	-0.709584	-0.355306	-0.250868	-0.237402	-0.408276
