# Supplementary material for: Inhibition of γ-glutamyl transferase suppresses airway hyperresponsiveness and airway inflammation in a mouse model of steroid resistant asthma exacerbation
Source: Front Immunol. 2023 Jun 12;14:1132939. doi: 10.3389/fimmu.2023.1132939 (PMC10292800; doi:10.3389/fimmu.2023.1132939)
Supplement: Supplementary file 8 [file Table_5.xlsx]

## Sheet: supplementary table5
Supplementary Table 5: Heat Map table of overlapping genes between DEGs and steroid-resistant genes.
	PBS1.read.count	PBS2.read.count	PBS3.read.count	OL12.read.count	OL34.read.count	OL56.read.count	OL78.read.count	OLG1.read.count	OLG2.read.count	OLG3.read.count	OLG4.read.count
Gnmt	0.839283	-0.0809928	2.07636	-1.43353	-0.966843	-0.711664	-0.807372	0.463427	0.337746	0.621692	-0.338112
Arrdc2	-0.0793108	-0.245332	1.37823	-1.51216	-1.2152	-0.387486	-0.887196	1.39916	0.814728	0.837479	-0.102906
Osgin1	0.257496	0.0228412	1.66028	-1.64049	-0.269432	-0.982863	-1.27987	0.280325	0.169959	0.652143	1.12961
Inhbb	-0.0710937	-0.598322	1.94485	-1.19536	-0.291331	-1.39361	-0.398361	1.41571	0.416331	0.239993	-0.0688053
Tekt5	0.903744	0.733274	1.48246	-1.36398	-0.556164	-0.159775	-1.29364	0.473616	0.0931797	0.915369	-1.22809
Fkbp5	-1.80949	-1.04206	-0.466668	0.383929	-0.77003	-0.287791	-0.181712	0.796842	1.11142	0.878551	1.38701
Fgfr3	0.460762	-0.731157	1.51538	-1.05728	-0.679019	-1.06829	-0.97322	1.24947	-0.144249	1.30048	0.127125
Plekhf1	-1.3144	-0.0223105	-0.497409	-0.933537	-0.825437	-0.464642	0.0546196	0.635405	1.82637	-0.0434288	1.58477
Sphk1	0.700052	-0.704402	1.75406	-1.65031	-0.400093	-0.476813	-0.759872	0.990303	-0.0566231	1.03756	-0.433867
Sec14l2	-1.18568	-0.719592	-0.199733	-1.54337	0.0406195	-0.748648	0.301495	0.683676	0.573579	1.01695	1.7807
Tns1	0.989974	0.275497	1.58086	-1.30936	-0.841835	-1.10902	-1.09756	0.860451	-0.0226483	0.89336	-0.219708
F7	-0.248084	-0.974537	1.37505	-0.136555	-0.604167	-2.1059	0.291784	0.818943	1.04369	0.649854	-0.110077
Itpkc	0.381959	0.307957	1.37477	-0.5251	-0.288147	-1.59572	-1.56889	-0.318556	0.18025	0.662045	1.38943
Xdh	0.741594	-0.327342	1.30831	0.100576	-0.958914	-1.56271	-0.896425	1.35383	-0.0899027	1.04873	-0.717744
Itga5	0.624725	0.331556	1.36091	-1.35072	-0.806068	-1.54762	-1.08085	0.507042	0.752336	0.772566	0.436125
Nab2	0.581565	0.584412	1.70478	-1.37581	-0.707422	-1.19546	-1.30323	0.686002	0.402668	0.493808	0.128683
Bdkrb2	0.977563	-0.190475	1.95287	-1.13004	-0.426591	-0.690556	-0.794565	0.31297	0.227229	0.987413	-1.22582
Synpo	0.2819	-0.612363	0.922996	-1.28444	-0.436085	-1.67509	-0.322866	0.398029	0.75743	0.188383	1.7821
Epha2	0.964411	0.405293	2.17267	-1.37147	-0.582982	-1.02483	-0.852245	-0.0923768	0.304852	0.242463	-0.16579
Snta1	-0.528292	0.982507	1.16353	-1.74107	-1.26406	-0.175693	-0.409955	0.0222234	0.687083	-0.175158	1.43889
Pim3	-0.323972	-0.156906	1.01031	-1.37243	-1.21054	0.0591955	-1.11301	1.77858	0.823258	0.633262	-0.127741
Socs3	0.660986	-0.672898	2.22397	-1.48901	-0.35781	-1.16452	-0.132379	0.312811	0.549563	0.181567	-0.11228
Midn	0.675764	0.794194	1.61919	-0.851983	-0.737071	-1.62435	-1.31643	0.4908	0.533661	0.345736	0.0704792
Bcl2l1	0.24086	-1.14891	0.821547	-1.58408	-1.0182	-0.0281709	-0.693579	1.08448	0.623718	1.52388	0.178457
Bag3	-0.812189	-0.358105	-1.14432	-1.13717	-0.756734	-0.216864	0.605184	0.364389	0.205812	1.33589	1.91411
Sertad1	0.808342	0.890835	1.70168	-1.02434	-1.11357	-0.861321	-1.31781	0.130178	0.349551	0.790548	-0.354093
Stub1	0.28189	0.359856	1.93757	-1.14345	-0.751638	-1.04004	-1.38444	0.453003	-0.0107779	0.405762	0.892264
Sulf2	-1.60018	0.268935	0.0612357	-0.0273172	-0.655287	-1.213	0.276395	-0.21874	1.34684	-0.112627	1.87375
Rhobtb1	-0.994093	0.267034	-1.34388	-0.7495	-0.795772	-0.256377	0.195192	0.760606	0.980826	-0.132273	2.06824
Rnf11	-0.289951	0.140848	-2.13493	0.220838	1.15796	1.33781	1.18468	-0.583699	-0.512743	-0.170807	-0.350015
Ugcg	0.544415	0.430147	-2.12164	0.883177	0.801199	1.13647	0.647215	-0.303515	-0.330937	-0.481992	-1.20454
Ptp4a2	-0.0548664	-0.447622	-1.98496	0.671897	1.32392	1.27634	1.02941	-0.322907	-0.429182	-0.295208	-0.766828
Id2	-0.382683	-0.989049	0.123193	1.32306	1.18875	0.583801	1.49533	-1.08573	-0.515731	-0.588096	-1.15285
Foxn2	-0.0245603	-0.438609	-1.76485	0.765766	1.50533	1.17165	0.923986	-0.181669	-0.687164	-0.246415	-1.02346
Nupr1	-0.590692	-0.752792	-0.228716	0.363576	1.41151	0.863176	1.21019	-0.754517	-0.601526	-1.75304	0.832827
Adm	1.84959	0.41758	1.71195	0.0342103	-0.218853	-0.314818	-0.0236099	-1.09935	-0.742195	-1.16946	-0.445048
Ptgs2	-1.02486	-0.422782	-1.33647	0.368119	1.84011	0.276274	1.66115	-0.466423	-0.0687987	-0.234517	-0.591794
Cpeb2	-0.802997	-0.680069	-1.98679	0.995051	0.922386	1.41354	0.902982	-0.110494	-0.367394	-0.369884	0.0836689
Fgd4	-0.703472	-0.485845	-2.07783	0.917502	1.27384	0.631552	1.28501	-0.396932	0.0464871	-0.525498	0.0351896
Foxp1	0.571292	-0.116785	0.139241	0.470329	1.49899	1.15182	0.496667	-0.806764	-1.72775	-0.310874	-1.36617
Dbi	-0.758205	0.318058	-0.981675	1.58836	0.432176	1.26437	0.615377	-1.39494	-0.0357289	-1.2911	0.243305
Ppp1r3b	-0.700381	0.0666379	-1.32419	2.07243	0.420848	0.810328	0.0634929	-0.721267	-0.016034	-1.30357	0.631707
Id4	-0.467232	-0.167168	-2.15147	0.594895	1.3949	1.31677	0.669614	-0.204003	-0.528715	-0.558323	0.100735
Sox4	1.09347	-0.133811	0.668662	1.14842	0.990086	0.129134	0.650573	-1.20195	-1.25954	-0.597881	-1.48716
Cxcl1	-0.840321	-0.548263	-0.695059	1.34838	2.01183	0.485124	0.766316	-0.860516	-0.438902	-0.873284	-0.355306
Lipc	-0.652214	-0.0622323	-1.14766	1.66968	0.160726	1.7265	0.702955	-0.157245	-0.432416	-0.660434	-1.14766
